# Supplementary material
Source: PubMed Central journal article supplement (PMC3563413)
Supplement: 97320630009029S1.pdf [file 97320630009029S1.pdf]

## Supplementary material:

**Table 1:** Accession details of short-listed Cubilin (CUBN) sequences

| Accession      | Description                                |
|----------------|--------------------------------------------|
| EAW86221.1     | Homo sapiens                               |
| XP_003831226.1 | Pan paniscus – Predicted                   |
| XP_003257731.1 | Nomascus leucogenys– Predicted             |
| XP_003930687.1 | Saimiri boliviensis boliviensis– Predicted |
| XP_003919387.1 | Papio anubis– Predicted                    |
| XP_003786834.1 | Otolemur garnettii– Predicted              |
| XP_003988178.1 | Felis catus– Predicted                     |
| EHB08007.1     | Heterocephalus glaber                      |
| EDL78718.1     | Rattus norvegicus– isoform CRA_b           |
| XP_002666724.2 | Danio rerio– Predicted                     |
| XP_001235156.2 | Gallus gallus– Predicted                   |
| EKC18187.1     | Crassostrea gigas                          |
| XP_003455793.1 | Oreochromis niloticus– Predicted           |
| XP_002806994.1 | Callithrix jacchus– Predicted              |
| EGI60892.1     | Acromyrmex echinator                       |
| EFN89302.1     | Harpegnathos saltator                      |
| XP_394526.3    | Apis mellifera – Predicted                 |
| XP_001843996.1 | Culex quinquefasciatus                     |
| EFN66210.1     | Camponotus floridanus                      |
| XP_001655059.1 | Aedes aegypti                              |
| EFX86741.1     | Daphnia pulex                              |
| EHJ68165.1     | Danaus plexippus                           |
| XP_003381549.1 | Trichinella spiralis                       |
| EGW02057.1     | Cricetulus griseus                         |
| ABV24853.1     | Xenopus (Silurana) tropicalis              |
| AAF61487.1     | Mus musculus                               |
